# Supplementary material for: Formation of xenon-nitrogen compounds at high pressure
Source: PubMed Central journal article supplement (PMC5066244; doi:10.1038/srep34896), 2016-10-17
Supplement: srep34896-s1.pdf [file srep34896-s1.pdf]

## Supplementary Information

### Formation of xenon-nitrogen compounds at high pressure

Ross T. Howie<sup>1\*</sup>, Robin Turnbull<sup>2</sup>, Jack Binns<sup>1</sup>, Mungo Frost<sup>2</sup>, Philip Dalladay-Simpson<sup>1</sup>, Eugene Gregoryanz<sup>2</sup>

<sup>1</sup> Center for High Pressure Science & Technology Advanced Research, Pudong, Shanghai, P.R. China.

<sup>2</sup> Centre for Science at Extreme Conditions and School of Physics and Astronomy, University of Edinburgh, Edinburgh EH9 3JZ, UK.

\*e-mail: ross.howie@hpstar.ac.cn

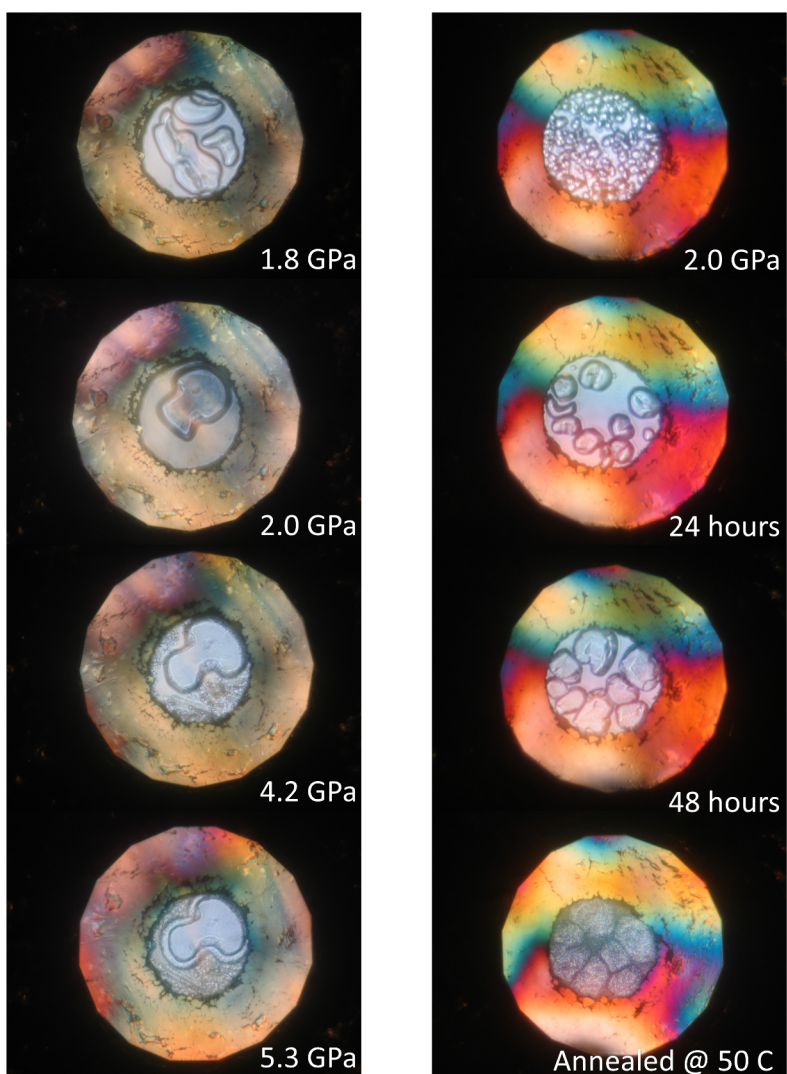

**Figure S1.** Micrographs of Xe-N<sub>2</sub> samples at low pressures. The left column shows the behaviour of a Xe-N<sub>2</sub> mixture of roughly 50/50 on compression to 5.3 GPa. The "8" shape figure is Xe single crystal embedded in a Xe(N<sub>2</sub>)<sub>2</sub>. The right column shows the evolution of a Xe-rich N<sub>2</sub>/Xe mixture over a 48 hour period after sample loading at constant pressure.

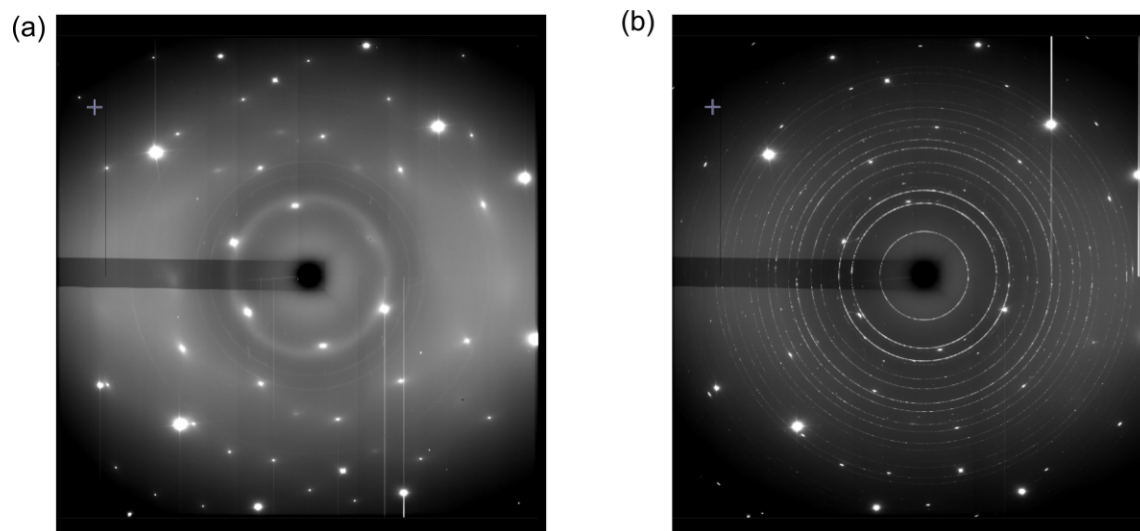

**Figure S2.** X-ray diffraction image plates (a) Data collected at 3 GPa shows the presence of the Xe fcc phase and the first diffraction peak from liquid nitrogen; (b) At 5.6 GPa the diffraction pattern of polycrystalline Xe(N<sub>2</sub>)<sub>2</sub> phase dominates the image plate. Additional peaks are due to excess Xe and scattering from the diamond anvils.

|                                 | Phase I                                                                                | Phase II                                                                               |
|---------------------------------|----------------------------------------------------------------------------------------|----------------------------------------------------------------------------------------|
| Crystal data                    |                                                                                        |                                                                                        |
| Chemical formula                | Xe(N <sub>2</sub> ) <sub>2</sub>                                                       | Xe(N <sub>2</sub> ) <sub>2</sub>                                                       |
| $M_r$                           | 243.3                                                                                  | 243.3                                                                                  |
| Crystal system, space group     | Cubic, $Fd\bar{3}m$                                                                    | Tetragonal, $I4_1/amd$                                                                 |
| Pressure (GPa)                  | 5.6                                                                                    | 18.7                                                                                   |
| $a$ (Å)                         | 9.2361 (3)                                                                             | 5.7228 (3)                                                                             |
| $c$ (Å)                         | 9.2361 (3)                                                                             | 9.2134 (10)                                                                            |
| $V$ (Å <sup>3</sup> )           | 787.88 (5)                                                                             | 301.74 (4)                                                                             |
| $Z$                             | 8                                                                                      | 4                                                                                      |
| Radiation type                  | Synchrotron ( $\lambda = 0.4872$ Å)                                                    | Synchrotron ( $\lambda = 0.4872$ Å)                                                    |
| Data collection                 |                                                                                        |                                                                                        |
| $2\theta$ values (°)            | $2\theta_{min} = 3.416, 2\theta_{max} = 33.451,$<br>$2\theta_{step} = 0.011$           | $2\theta_{min} = 3.724, 2\theta_{max} = 24.979,$<br>$2\theta_{step} = 0.011$           |
| Refinement                      |                                                                                        |                                                                                        |
| $R$ factors and goodness of fit | $R_p = 0.009, R_{wp} = 0.019,$<br>$R_{exp} = 0.018, R(F) = 0.082,$<br>$\chi^2 = 1.103$ | $R_p = 0.015, R_{wp} = 0.021,$<br>$R_{exp} = 0.018, R(F) = 0.094,$<br>$\chi^2 = 1.369$ |
| No. of parameters               | 8                                                                                      | 17                                                                                     |

TABLE I. Crystal structure data, experiment and refinement details for Xe(N<sub>2</sub>)<sub>2</sub> phases I and II.

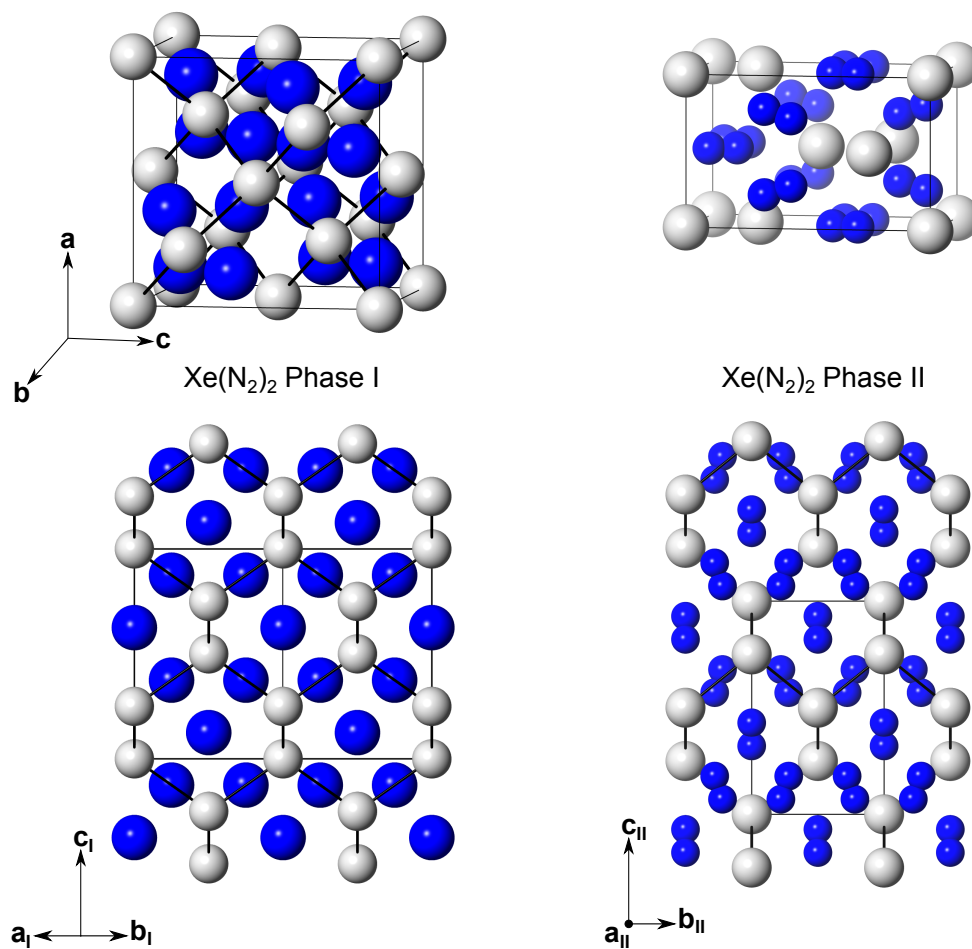

**Figure S3.** Crystal structures of Xe(N<sub>2</sub>)<sub>2</sub> phases I and II. Ordering and alignment of N<sub>2</sub> molecules occurs over the transition leading to a tetragonal distortion along  $c_{II}$ . Freely rotating N<sub>2</sub> molecules in phase I are represented by blue balls, whilst in phase II blue balls represent atoms in aligned molecules.

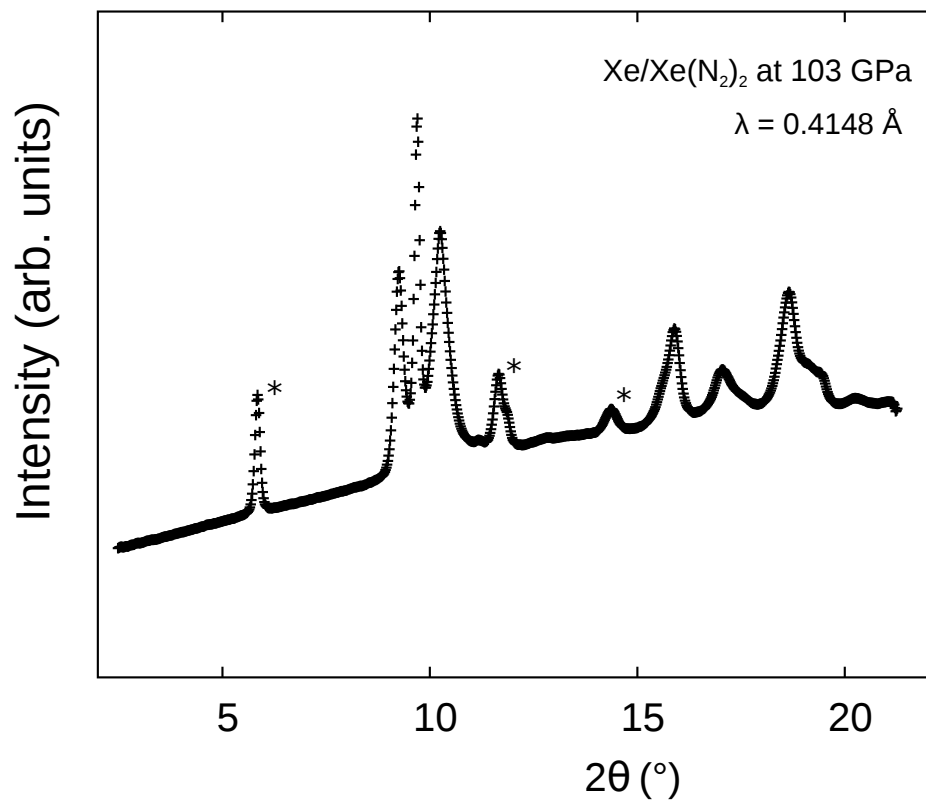

**Figure S4.** X-ray diffraction pattern of Xe/Xe(N<sub>2</sub>)<sub>2</sub> at 103 GPa. Low-angle peak marked by \* corresponds to the (101) peak of Xe(N<sub>2</sub>)<sub>2</sub>, additional diffracted intensity marked by \* are also due to Xe(N<sub>2</sub>)<sub>2</sub>, although an unambiguous indexing is not possible due.

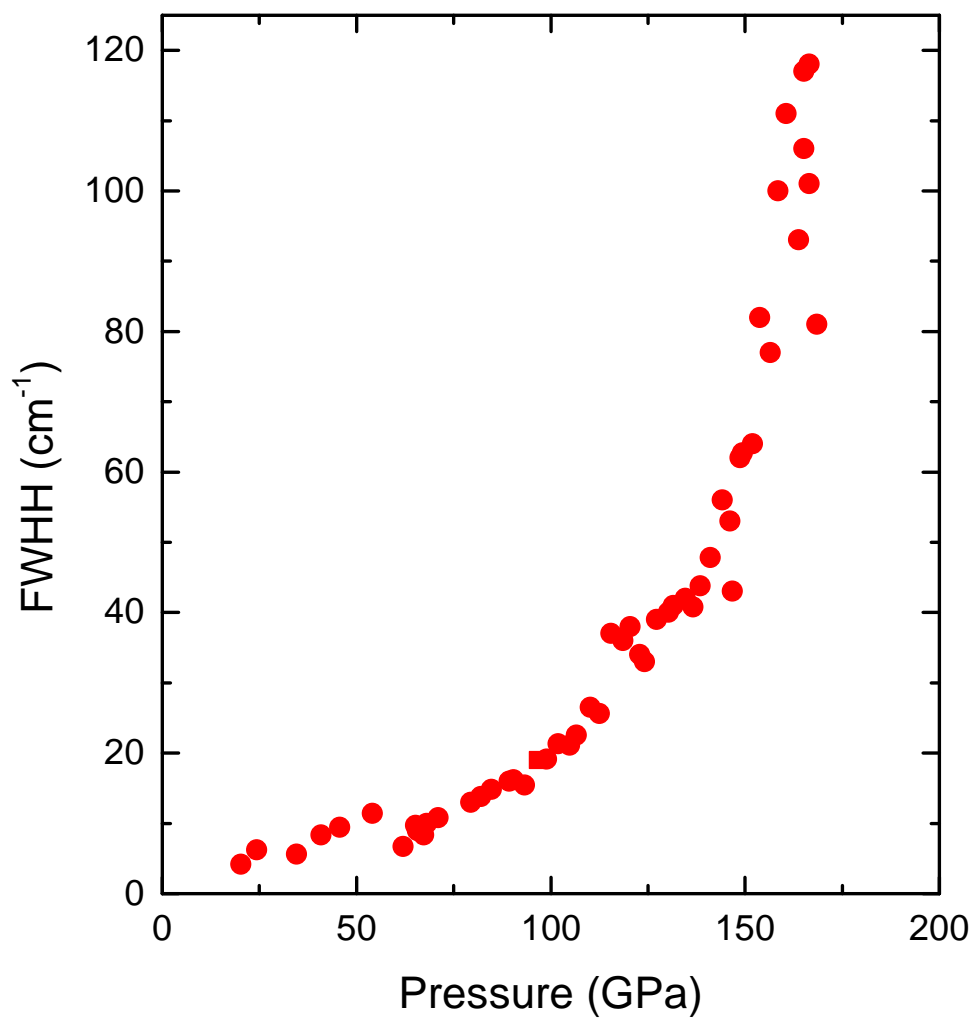

**Figure S5.** Full width at half height as a function of pressure for the Xe-rich sample.

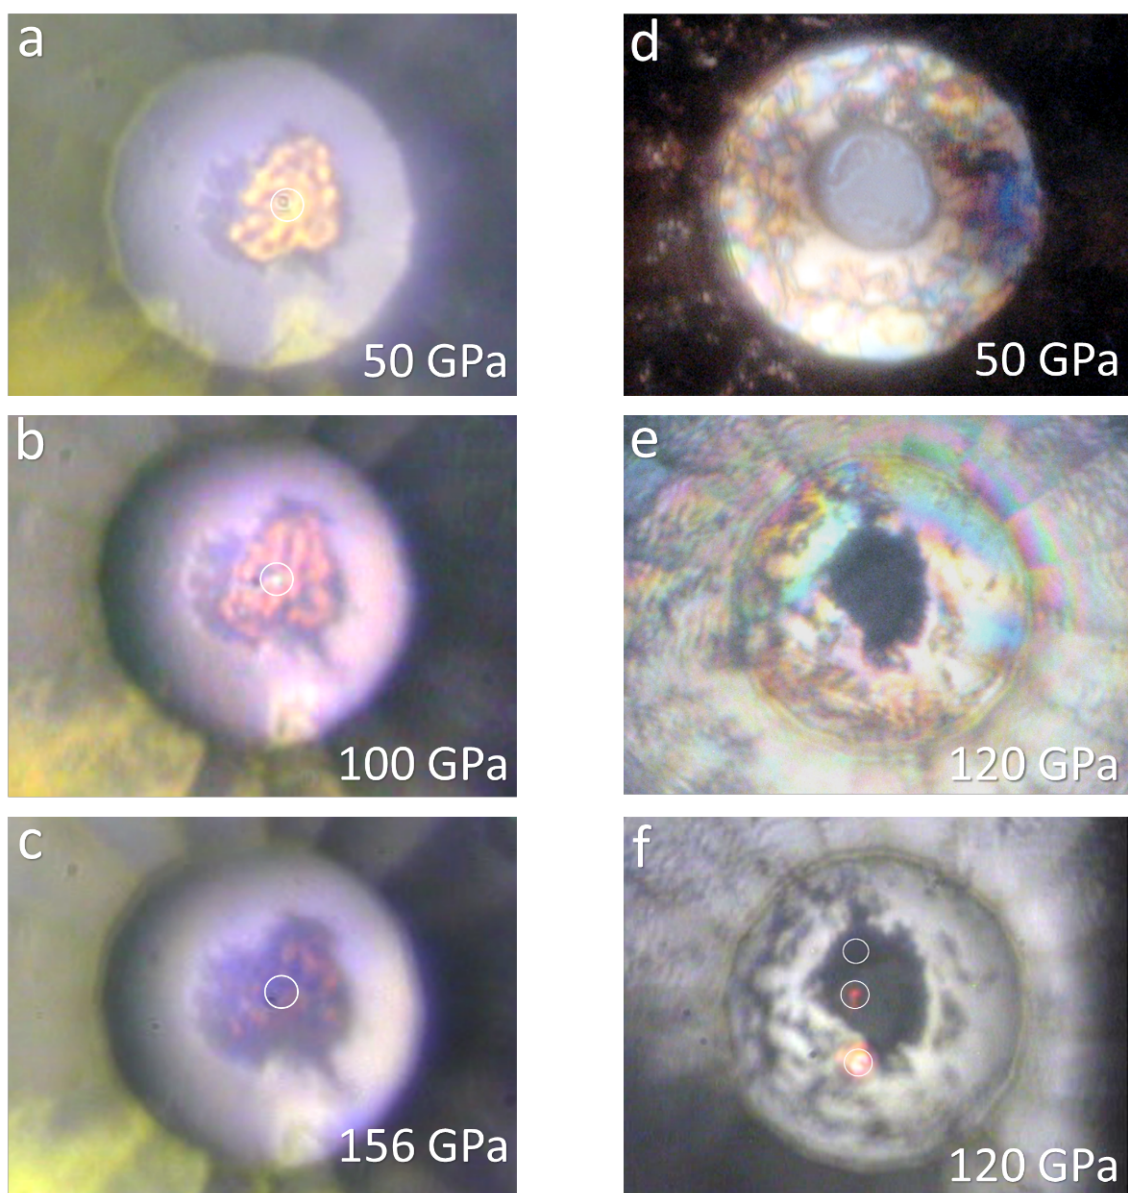

**Figure S6.** (a-c): The nitrogen-rich sample becomes less transparent to visible light on compression to 156 GPa. 514 nm laser light is incident in the centre of each sample indicated by white circles; (d-e); The Xe-rich sample was transparent at 50 GPa becoming opaque by 120 GPa; (e) Xe-rich sample at 120 GPa. 647 nm laser light of the same intensity is incident on the gasket and the sample as indicated by the white circles.



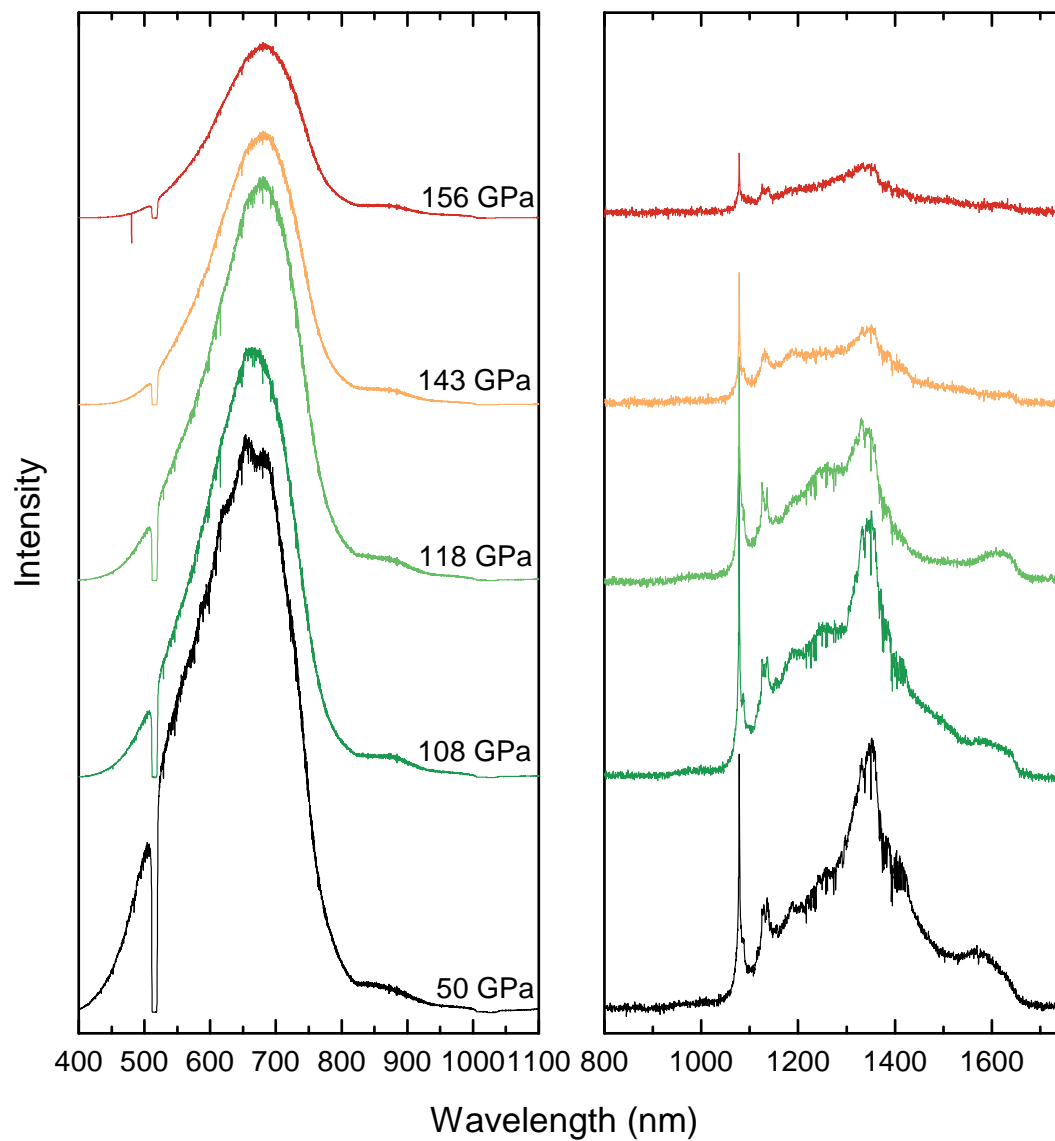

**Figure S7.** Raw transmission spectra for the N<sub>2</sub>-rich sample in the visible (left) and mid infra-red regions (right) up to 156 GPa. The dip in intensity at 514 nm is due to the notch filters.
